# Supplementary material for: Neurogenesis in the olfactory bulb induced by paced mating in the female rat is opioid dependent
Source: PubMed Central journal article supplement (PMC5673160; doi:10.1371/journal.pone.0186335), 2017-11-06
Supplement: pone.0186335.s005.pdf [file pone.0186335.s005.pdf]

## Inmunohistoquímica para BrdU especie rata

Fecha:

Grupo:

|                                                                                                                                                                         |  |  |  |              |
|-------------------------------------------------------------------------------------------------------------------------------------------------------------------------|--|--|--|--------------|
| 1. Lavados con TBS (3 min c/u)                                                                                                                                          |  |  |  |              |
| 2. Incubarcon TBS, Tritón X (1%) y H2O2 (1%) (30 min)                                                                                                                   |  |  |  |              |
| 3. Lavar TBS (3min)                                                                                                                                                     |  |  |  |              |
| 4. Incubar con 2N HCL 37°C (1h)                                                                                                                                         |  |  |  |              |
| 5.- Lavar con TBS (3 min)                                                                                                                                               |  |  |  |              |
| 6. Incubación con TBS y borohidrato de sodio (0.5%) (15 min)                                                                                                            |  |  |  |              |
| 7. Lavados con TBS (3 min c/u)                                                                                                                                          |  |  |  |              |
| 8. Incubadocon TBS, albumina (10%) y TX (0.3%) (30 min)                                                                                                                 |  |  |  |              |
| 9. ANTICUERPO PRIMARIO<br>Anti ratón 1:2,000                                                                                                                            |  |  |  |              |
| en TBS, albumina (1%) y TX (0.32%) (16 hrs mínimo)                                                                                                                      |  |  |  |              |
| 10. Lavados TBS con TX (0.02%) y albumina (1%) (5 min c/u)                                                                                                              |  |  |  |              |
| 10. ANTICUERPO SECUNDARIO<br>Anti.IgG mouse: 1:500                                                                                                                      |  |  |  |              |
| en TBS, albumina (1%) y TX (0.32%) (2 hrs)                                                                                                                              |  |  |  |              |
| 11. Lavados con TBS y TX (0.02%) (5 min c/u) preparar ABC                                                                                                               |  |  |  |              |
|                                                                                                                                                                         |  |  |  | preparar ABC |
| 12. Incubar ABC (2 gotas de A, 2 gotas de B en 10ml) (90 min)<br>*preparar con media hora antes de usarse. Nota guardar un poco para verificar que la reacción funciona |  |  |  |              |
| 13. Lavados con TBS (3min c/u)                                                                                                                                          |  |  |  |              |
| 14. Revelado con DAB (10 min máx)                                                                                                                                       |  |  |  |              |
| 15. Lavados con TBS (3 min c/u)                                                                                                                                         |  |  |  |              |

Solucion de DAB para 50ml  
 45ml de agua desionizada  
 30mg de DAB  
 36microlitros de H2O2 al 30%  
 solucion refrigerar al utilizar agregar  
 5mil de solucion de nikel al 1%

Nike 1gr en 100ml de agua tridestilada o desionizada.
