# Supplementary material for: Neurogenesis in the olfactory bulb induced by paced mating in the female rat is opioid dependent
Source: PubMed Central journal article supplement (PMC5673160; doi:10.1371/journal.pone.0186335), 2017-11-06
Supplement: pone.0186335.s006.pdf [file pone.0186335.s006.pdf]

## Inmuno amplificación BrdU/NEUN/GFAP fluorescencia

| 1er DÍA                                                                                                 |                                          |  |  |  |
|---------------------------------------------------------------------------------------------------------|------------------------------------------|--|--|--|
| 1. Lavados con PBS (10 min c/u)                                                                         |                                          |  |  |  |
| 2. Incubar con PBS y borohidrato de sodio (0.5%) (15 min)                                               |                                          |  |  |  |
| 3. Lavados con PBS (10 min c/u)                                                                         |                                          |  |  |  |
| 4. Incubar con PBS, Tritón X (1%) y H2O2 (1%) (30 min)                                                  |                                          |  |  |  |
| 5. Incubar con PBS y DMSO (1%) (10 min)                                                                 |                                          |  |  |  |
| 6. Lavados con PBS (10 min c/u)                                                                         |                                          |  |  |  |
| 7. Incubar con 2N HCL (60 min) 37°C                                                                     |                                          |  |  |  |
| 8. Lavado con PBS (10 min)                                                                              |                                          |  |  |  |
| 9. Incubar con PBS y borohidrato de sodio (0.5%) (15 min)                                               |                                          |  |  |  |
| 10. Lavados con PBS (10 min c/u)                                                                        |                                          |  |  |  |
| 11. Incubar con PBS, Albúmina 10% y TX (0.3%) (30 min)                                                  |                                          |  |  |  |
| <b>12. ANTICUERPO PRIMARIO</b><br><b>serotec 1:800</b><br>1% y TX (0.32%) (20 hrs mínimo) a 4°C,.       | <b>Anti-BrdU (rata)</b><br>PBS, Albúmina |  |  |  |
| 2do DÍA                                                                                                 |                                          |  |  |  |
| 13. Lavados PBS con TX (0.02%) y Albúmina 1% (15 min)                                                   |                                          |  |  |  |
| <b>14. ANTICUERPO SECUNDARIO</b><br>biotilado _____ vector 1:500<br>Albúmina 1% y Tx (0.32%) (3 hrs)    | Anti rata IgG<br>en PBS,                 |  |  |  |
| 15. Lavados con PBS y TX (0.02%) (10 min c/u)    PREPARAR COMPLEJO AB                                   |                                          |  |  |  |
| 16. Para 10mil de PBS (2A 2B)- TX 0.32% incubar por 90 min                                              |                                          |  |  |  |
| 17. Lavados con PBS (10 min c/u)                                                                        |                                          |  |  |  |
| 18. Kit Cumarina 1:100 (portaobjetos <b>Sin Gelatinizar</b> ) A partir de aquí OSCURAS!!! CÁMARA HÚMEDA |                                          |  |  |  |
| 19. Lavar con PBS (10 min)                                                                              |                                          |  |  |  |
| 20. Incubar anticuerpo primario* en PBS-TX 0.32%, albúmina 1% (20 hrs a 4°C) <b>NeuN ratón (1:250)</b>  |                                          |  |  |  |

## Inmuno amplificación BrdU/NEUN/GFAP fluorescencia-2

| 3er DÍA                                                                                                             |                       |  |  |
|---------------------------------------------------------------------------------------------------------------------|-----------------------|--|--|
| 21. Lavar con PBS-TX 0.02%, albúmina 1% (15 min)                                                                    |                       |  |  |
| 22. <b>ANTICUERPO SECUNDARIO</b><br>IgG biotilado _____ vector 1:300<br>Albúmina 1% y Tx (0.32%) (3 hrs)            | Anti mouse<br>en PBS, |  |  |
| 23. Lavados con PBS y TX (0.02%) (10 min c/u)<br><b>COMPLEJO AB</b>                                                 | <b>PREPARAR</b>       |  |  |
| 24. Para 10mil de PBS (2A 2B)- TX 0.32% incubar por 90 min                                                          |                       |  |  |
| 25. Lavados con PBS (10 min c/u)                                                                                    |                       |  |  |
| 26. Kit CY3 1:100 (portaobjetos <b>Sin Gelatinizar</b> ) A partir de aquí <b>OSCURAS!!!</b><br><b>CÁMARA HÚMEDA</b> |                       |  |  |
| 27. Lavar con PBS (10 min)                                                                                          |                       |  |  |
| 28. Incubar anticuerpo primario* en PBS-TX 0.32%, albúmina 1% (20 hrs a 4°C)<br>GFAP conejo ( <b>1:500</b> )        |                       |  |  |
| 4to DÍA                                                                                                             |                       |  |  |
| 29. Lavar con PBS-TX 0.02%, albúmina 1% (15 min)                                                                    |                       |  |  |
| 30. Anticuerpo secundario ** en PBS-TX 0.32%, Albúmina 1% (3hrs).<br>488 antirabbit (1:1250 VERDE)                  | Alexa                 |  |  |
| 31. Lavar con PBX-TX 0.02% (10 min)                                                                                 |                       |  |  |
| 32. Lavar con PBS (10 min)                                                                                          |                       |  |  |
